# Supplementary material
Source: PubMed Central journal article supplement (PMC7080564)
Supplement: NIHMS1554050-supplement-Supp_Tables.pdf [file NIHMS1554050-supplement-Supp_Tables.pdf]

## **Supplementary Information**

### **Incomplete hydrolysis of curcumin conjugates by $\beta$ -glucuronidase. Detection of complex conjugates in plasma**

Paula B. Luis, Andrew G. Kunihiro, Janet L. Funk, and Claus Schneider

Content:

SI Tables 1 and 2.

SI Figure 1.

**SI Table 1. Molecular and fragment ions used for SRM analyses of curcumin conjugates in positive ion mode.** Transitions in blue font in the calculated/predicted ion pairs resulted in successful detection of a conjugate from both unlabeled and d<sub>6</sub>-curcumin.

| Conjugate                            | curcumin                             |                            |              | CID<br>(eV) | d <sub>6</sub> -curcumin             |                            |
|--------------------------------------|--------------------------------------|----------------------------|--------------|-------------|--------------------------------------|----------------------------|
|                                      | [M+H] <sup>+</sup><br>( <i>m/z</i> ) | fragment<br>( <i>m/z</i> ) | loss         |             | [M+H] <sup>+</sup><br>( <i>m/z</i> ) | fragment<br>( <i>m/z</i> ) |
| Experimentally determined ion pairs: |                                      |                            |              |             |                                      |                            |
| curcumin                             | 369.0                                | 177.0                      | 192 (cleave) | 20          | 375.3                                | 180.2                      |
| C-G                                  | 545.2                                | 369.2                      | 176 (G)      | 15          | 551.4                                | 375.2                      |
| C-S                                  | 449.4                                | 285.4                      | 164 (cleave) | 20          | 455.4                                | 291.0                      |
| Calculated/predicted ion pairs:      |                                      |                            |              |             |                                      |                            |
| C-diG                                | 721.6                                | 369.2                      | 352 (2G)     | 15          | 727.6                                | 375.2                      |
|                                      | 721.6                                | 545.2                      | 176 (G)      | 15          | 727.6                                | 551.4                      |
| C-diS                                | 529.5                                | 369.2                      | 160 (2S)     | 15          | 535.5                                | 375.2                      |
|                                      | 529.5                                | 449.4                      | 80 (S)       | 15          | 535.5                                | 455.4                      |
|                                      | 529.5                                | 285.4                      | 244 (cleave) | 20          | 535.5                                | 291.0                      |
| C-SG                                 | 625.6                                | 369.2                      | 256 (GS)     | 15          | 631.6                                | 375.2                      |
|                                      | 625.6                                | 545.2                      | 80 (S)       | 15          | 631.6                                | 551.4                      |
|                                      | 625.6                                | 449.4                      | 176 (G)      | 15          | 631.6                                | 455.4                      |
|                                      | 625.6                                | 285.4                      | 340 (cleave) | 20          | 631.6                                | 291.0                      |
| C-SdiG                               | 801.7                                | 369.2                      | 423 (SdiG)   | 15          | 807.7                                | 375.2                      |
|                                      | 801.7                                | 721.6                      | 80 (S)       | 15          | 807.7                                | 727.6                      |
|                                      | 801.7                                | 449.4                      | 352 (diG)    | 15          | 807.7                                | 455.4                      |
|                                      | 801.7                                | 285.4                      | 516 (cleave) | 20          | 807.7                                | 291.0                      |
| C-GdiS                               | 705.6                                | 369.2                      | 336 (GdiS)   | 15          | 711.6                                | 375.2                      |
|                                      | 705.6                                | 529.5                      | 176 (G)      | 15          | 711.6                                | 535.2                      |
|                                      | 705.6                                | 449.4                      | 256 (GS)     | 15          | 711.6                                | 455.4                      |
|                                      | 705.6                                | 285.4                      | 420 (cleave) | 20          | 711.6                                | 291.0                      |

C, curcumin; G, glucuronide; S, sulfate.

**SI Table 2. Molecular and fragment ions used for SRM analyses of curcumin conjugates in negative ion mode.** Transitions in blue font in the calculated/predicted ion pairs resulted in successful detection of a conjugate from both unlabeled and d<sub>6</sub>-curcumin.

| Conjugate                            | curcumin                    |                   |              | CID<br>(eV) | d <sub>6</sub> -curcumin    |                   |
|--------------------------------------|-----------------------------|-------------------|--------------|-------------|-----------------------------|-------------------|
|                                      | [M-H] <sup>-</sup><br>(m/z) | fragment<br>(m/z) | loss         |             | [M-H] <sup>-</sup><br>(m/z) | fragment<br>(m/z) |
| Experimentally determined ion pairs: |                             |                   |              |             |                             |                   |
| curcumin                             | 367.4                       | 217.0             | 150 (cleave) | 10          | 373.1                       | 220.0             |
| C-G                                  | 543.4                       | 217.0             | 326 (cleave) | 20          | 549.4                       | 220.0             |
| C-S                                  | 447.2                       | 217.0             | 230 (cleave) | 15          | 453.2                       | 220.0             |
| Calculated/predicted ion pairs:      |                             |                   |              |             |                             |                   |
| C-diG                                | 719.6                       | 217.0             | 502 (cleave) | 20          | 725.6                       | 220.4             |
|                                      | 719.6                       | 543.4             | 176 (G)      | 15          | 725.6                       | 549.4             |
| C-diS                                | 527.5                       | 217.0             | 310 (cleave) | 15, 20      | 533.5                       | 220.4             |
|                                      | 527.5                       | 447.2             | 80 (S)       | 15          | 533.5                       | 453.2             |
| C-SG                                 | 623.6                       | 217.0             | 406 (cleave) | 15, 20      | 629.6                       | 220.4             |
|                                      | 623.6                       | 543.4             | 80 (S)       | 15          | 629.6                       | 549.4             |
|                                      | 623.6                       | 447.2             | 176 (G)      | 15          | 629.6                       | 453.2             |
| C-SdiG                               | 799.7                       | 217.0             | 582 (cleave) | 15, 20      | 805.7                       | 220.4             |
|                                      | 799.7                       | 719.6             | 80 (S)       | 15          | 805.7                       | 725.6             |
|                                      | 799.7                       | 447.2             | 352 (diG)    | 15          | 805.7                       | 453.2             |
| C-GdiS                               | 703.6                       | 217.0             | 486 (cleave) | 15, 20      | 709.6                       | 220.4             |
|                                      | 703.6                       | 527.5             | 176 (G)      | 15          | 709.6                       | 533.5             |
|                                      | 703.6                       | 447.2             | 256 (GS)     | 15          | 709.6                       | 453.2             |

C, curcumin; G, glucuronide; S, sulfate.

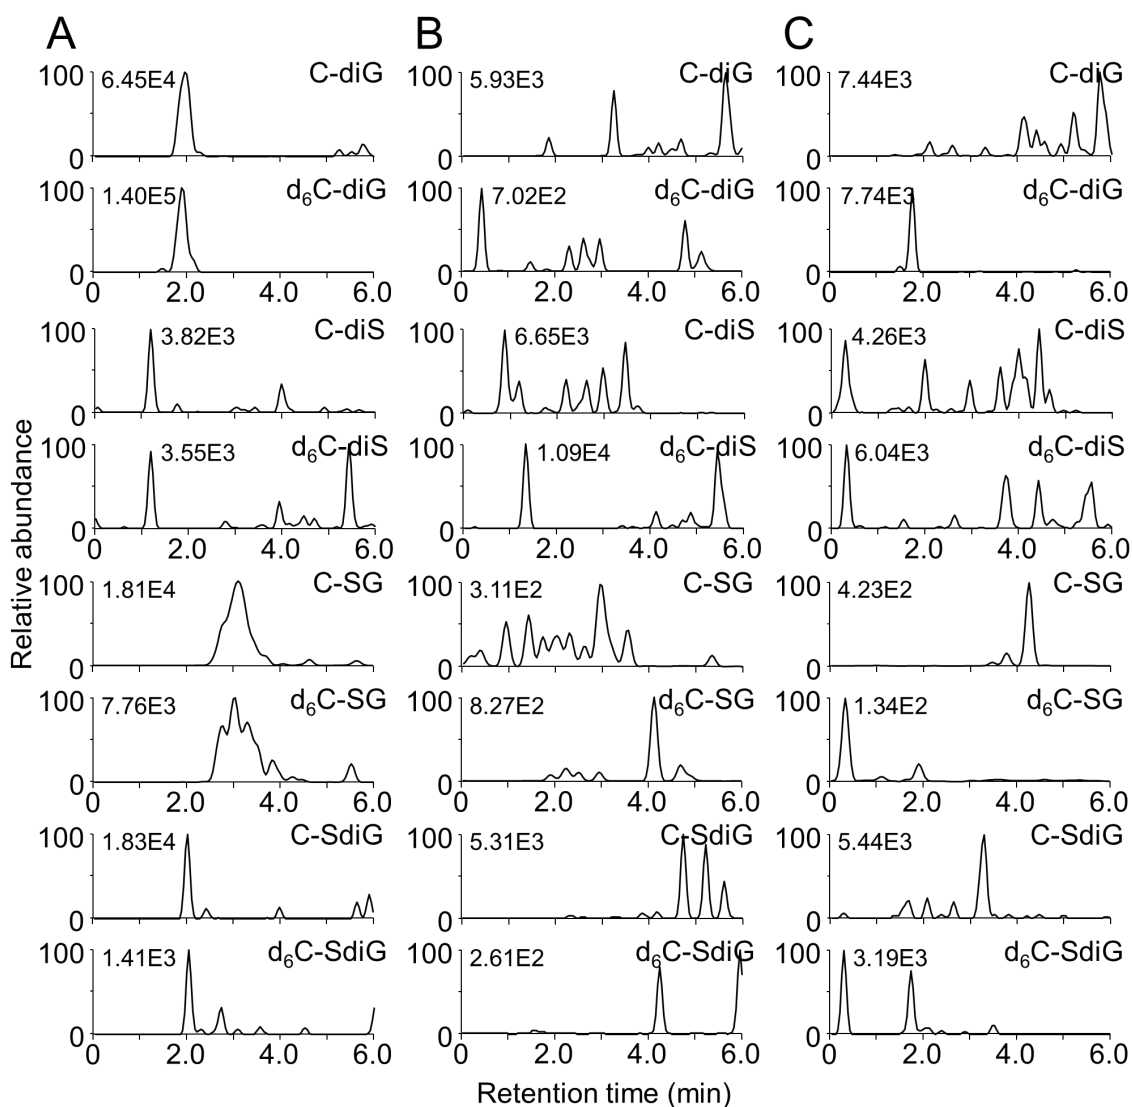

**SI Fig. 1. Analysis of complex conjugates in plasma of mice treated with a 1:1 mixture of curcumin and d<sub>6</sub>-curcumin with and without hydrolysis.** (A) Untreated plasma, (B) plasma treated with β-glucuronidase, (C) plasma treated with sulfatase. Panel (A) shows the same chromatograms as Figure 5 in the main text. Ion trace chromatograms were acquired using analytical conditions listed in Table 1 in the main text. The numbers indicate the highest ion intensity in each trace.
